# Supplementary material
Source: MDPI journal article supplement (https://www.mdpi.com/2304-6732/8/11/489)
Supplement: s1 [file s1 › photonics-1402837-supplementary.pdf]

# A metasurface beam combiner based on the control of angular response

Zhihao Liu <sup>1</sup>, Weibin Feng <sup>1</sup>, Yong Long <sup>1</sup>, Songming Guo <sup>1</sup>, Haowen Liang <sup>1,2</sup>, Zhiren Qiu <sup>1,\*</sup>, Xiao Fu <sup>1,\*</sup>, Juntao Li <sup>1,\*</sup>

<sup>1</sup> State Key Laboratory of Optoelectronic Materials and Technologies, School of Physics, Sun Yat-sen University, Guangzhou, 510275, China; liuzhh59@mail2.sysu.edu.cn; fengwb3@mail2.sysu.edu.cn; longy23@mail2.sysu.edu.cn; guosm3@mail2.sysu.edu.cn

<sup>2</sup> Southern Marine Science and Engineering Guangdong Laboratory (Zhuhai), Zhuhai, 519080, China; lianghw26@mail.sysu.edu.cn

\* Correspondence: stsqr@mail.sysu.edu.cn, xiaof58@mail.sysu.edu.cn, lij3@mail.sysu.edu.cn

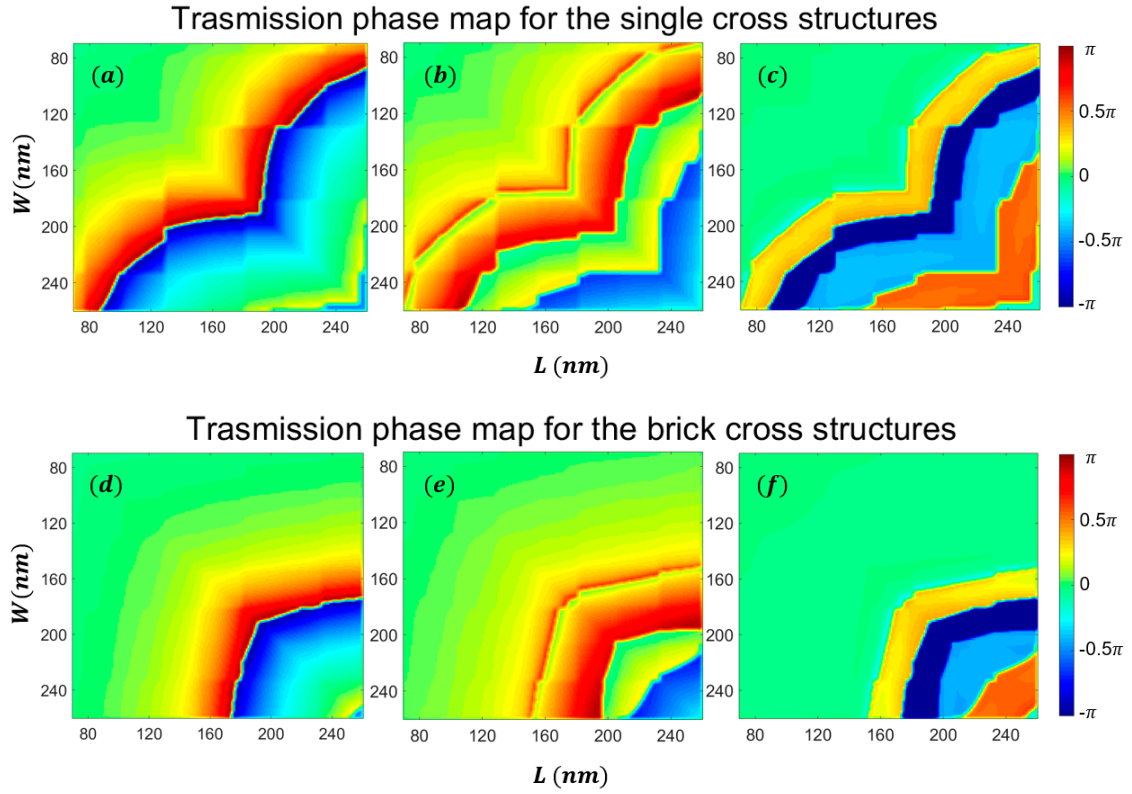

**Figure S1.** Transmission phase map of the single cross structures (a-c) and brick structures (d-f). (a,d)  $-3.7^\circ$  incident light; (b,e)  $15^\circ$  incident light; (c,f) the phase difference between (a) and (b), (d) and (e). The unitcell's size is 520 nm, the structure height (H) is 500 nm, the length (L) and the width (W) vary from 70-260 nm.

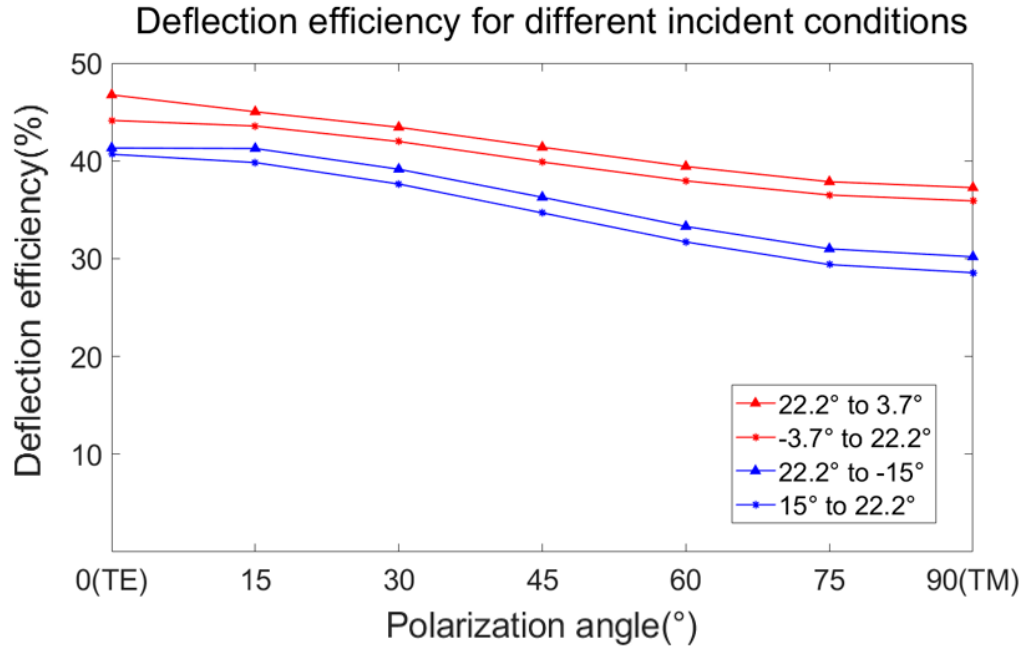

**Figure S2.** Deflection efficiency for different incident conditions. The blue circles represent the efficiencies of  $-3.7^\circ$  incident light being deflected to  $22.2^\circ$  as a function of polarization angle. The red circles represent the efficiencies of  $15^\circ$  incident light being deflected to  $22.2^\circ$  as a function of polarization angle. The triangles represent the deflection efficiencies of light beams incident from the opposite side of the metasurface at an angle of  $22.2^\circ$ .
